# Supplementary material for: Versatile hybrid acoustic micromixer with demonstration of circulating cell-free DNA extraction from sub-ml plasma samples
Source: Royal Society of Chemistry journal article supplement (doi:10.1039/c9lc01130g), 2020-01-01
Supplement: c9lc01130g1.pdf [file c9lc01130g1.pdf]

**Electronic supplementary information (ESI) for:**

**Versatile hybrid acoustic micromixer with  
demonstration of circulating cell-free DNA extraction  
from sub-ml plasma samples**

*Alvaro J. Conde,<sup>a,b</sup> Ieva Keraite,<sup>a,b</sup> Alfredo E. Ongaro,<sup>a,b,c</sup> and Maiwenn Kersaudy-Kerhoas<sup>a,b</sup>*

<sup>a</sup>. Institute of Biological Chemistry, Biophysics and Bioengineering, School of Engineering and Physical Science, Heriot-Watt University, Edinburgh, UK.

<sup>b</sup>. Infection Medicine, Edinburgh Medical School, College of Medicine and Veterinary Medicine, The University of Edinburgh, Edinburgh, UK.

<sup>c</sup>. Department of Civil, Environmental, Aerospace and Materials Engineering (DICAM), University of Palermo, Palermo, Italy.

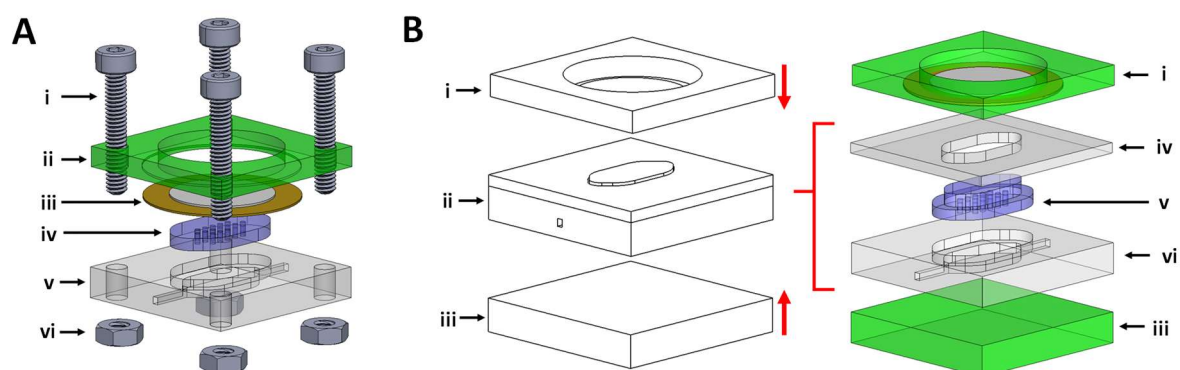

**Fig. S1.** A) Experimental version of the hybrid concept in exploded view: i) Mounting screws, ii) fitting frame for the piezoelectric, iii) piezoelectric disc, iv) slab, v) substrate and vi) mounting nuts. B) Disposable version of the hybrid concept in exploded view: i) fitting frame with a glued piezoelectric disc, ii) monolithic disposable chip integrating the micromixer, iii) base, iv) auxiliary chip layer to compress the slab and provide sealing, v) slab, vi) substrate. The red arrows indicate that the chip is compressed in between layers i and iii to provide intimate contact between the piezoelectric disc and the slab.

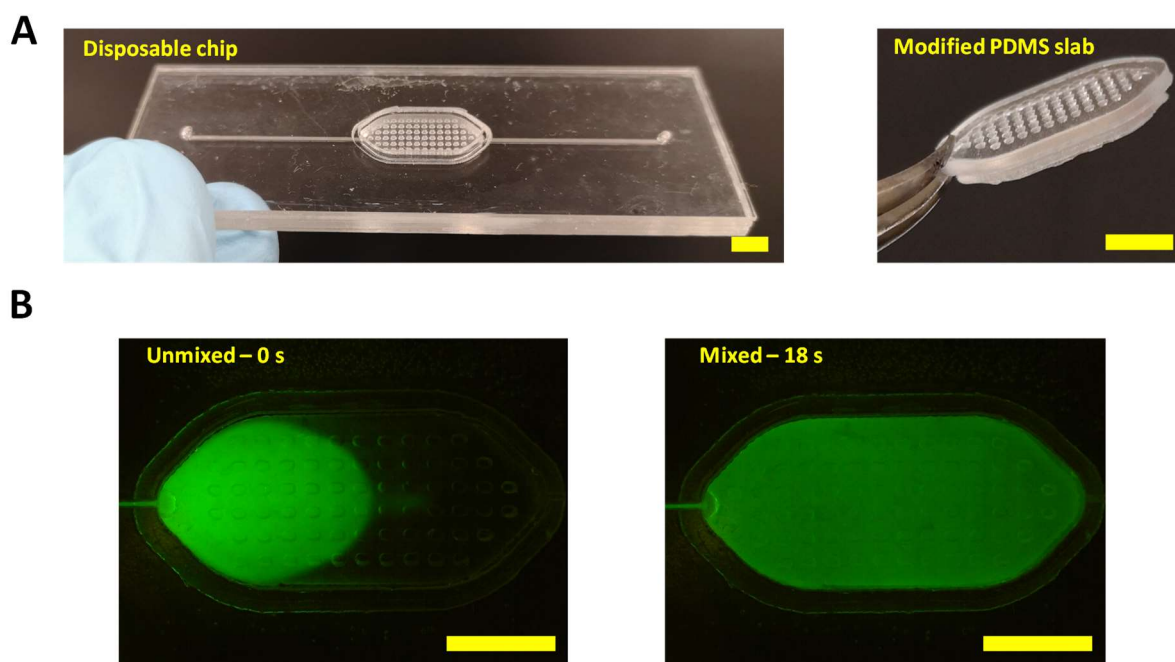

**Fig. S2.** A) Photographs of a PMMA micromixer chip and the modified PDMS slab using the disposable configuration. B) Micrographs of a 200  $\mu$ l mixing chamber under static flow conditions before and after mixing using the disposable configuration. Scale bars are 4 mm.

## Electronic Supplementary information (ESI)

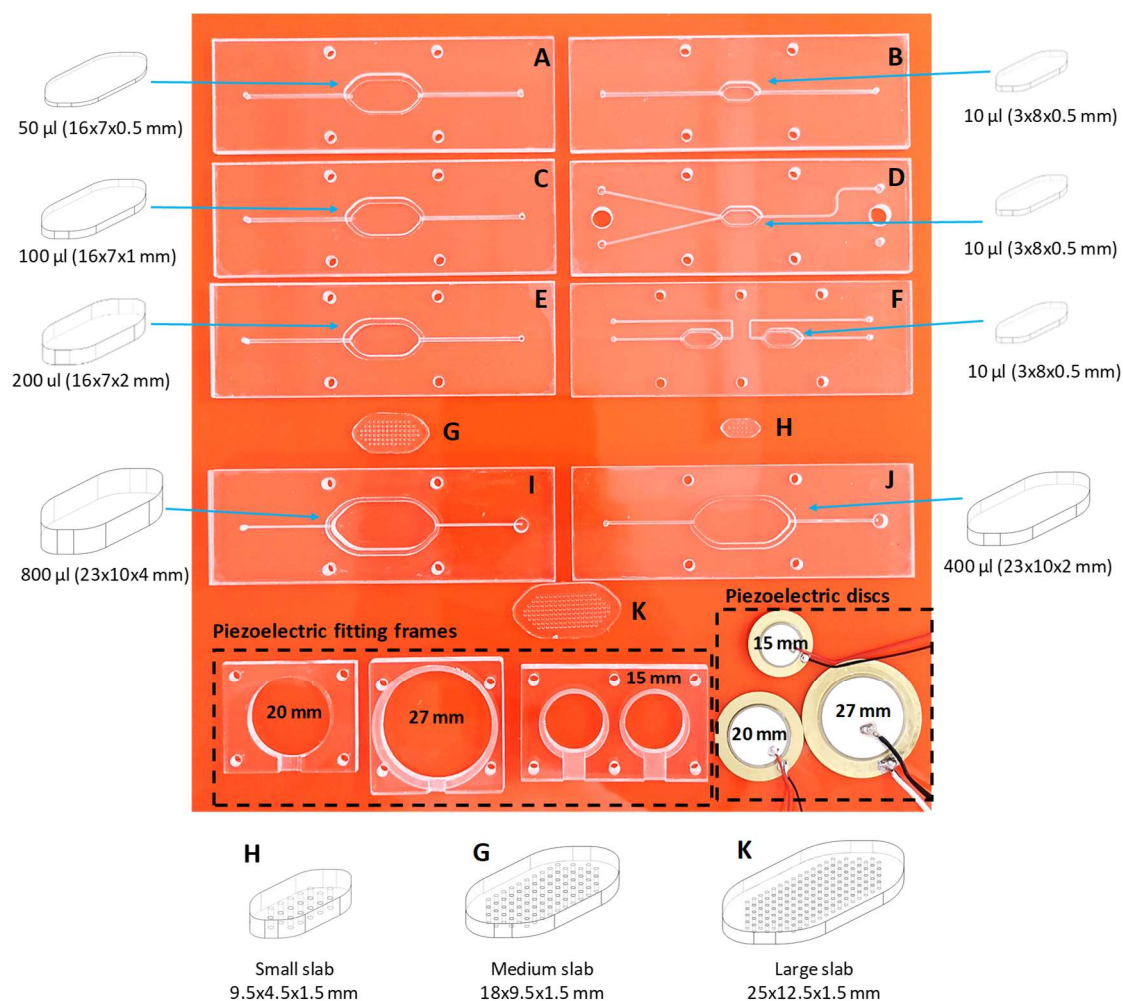

**Fig. S3.** Photograph showing the PMMA microfluidic chips, the PDMS slabs, the fitting frames and the piezoelectric discs used for the experimental characterisation. A) 50  $\mu\text{l}$  static-flow micromixer, B) 10  $\mu\text{l}$  static-flow micromixer, C) 100  $\mu\text{l}$  static-flow micromixer, D) Continuous-flow micromixer (mixing chamber 10  $\mu\text{l}$ ), E) 200  $\mu\text{l}$  static-flow micromixer, F) chip for evaluation of the capability to individually-address different mixing modules within the same chip (mixing chamber 10  $\mu\text{l}$ ), G) medium slab, H) small slab, I) 800  $\mu\text{l}$  static-flow micromixer, J) 400  $\mu\text{l}$  static-flow micromixer, K) large slab. All the chambers and slabs dimensions are expressed as maximum length, maximum width and height. All the chips are 25.4 x 76.2 mm in size.

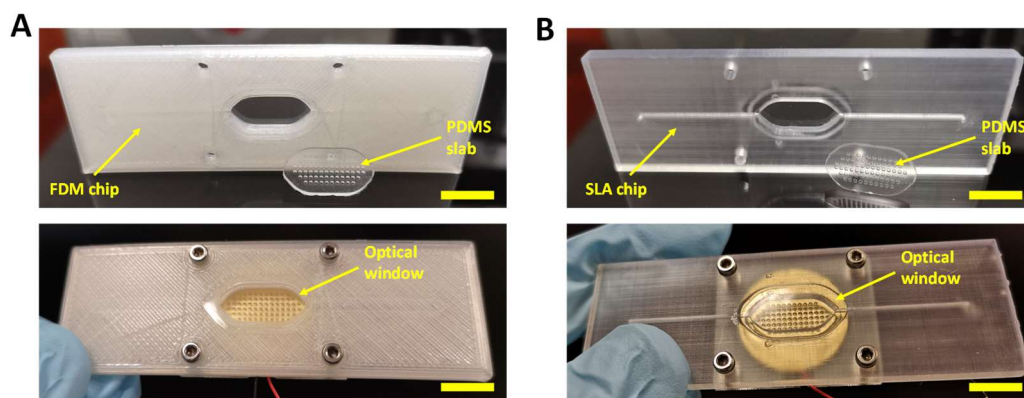

**Fig. S4.** A) Micromixer chip fabricated using FDM-3D printing technology. B) Micromixer chip fabricated using SLA-3D printing technology. The PDMS slab is the same for both chips (medium slab). Scale bars are 10 mm.

## Electronic Supplementary information (ESI)

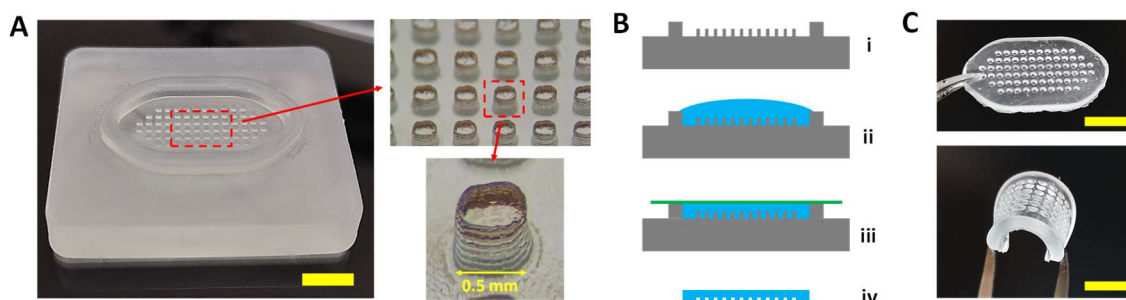

**Fig. S5.** A) Photograph of a SLA 3D-printed mould and micrographs showing the detail of the pillars. B) Process for the fabrication of the PDMS slabs: i) clean 3D printed mould, ii) casting of the PDMS mixture, iii) addition of PMMA layer to flatten the top surface, iv) peeled PDMS slab. C) Photographs of a fabricated PDMS slab. Scale bars are 5 mm.

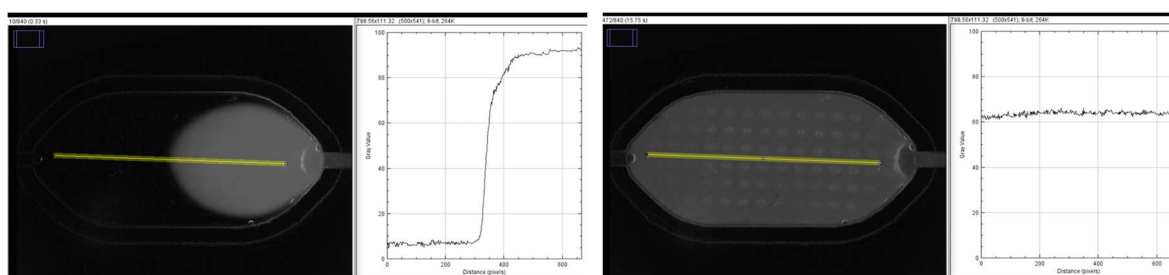

**Fig. S6.** Mixing evaluation using image analysis from the supporting video 2 before (left) and after mixing (right). The cut line (averaged width 20 px) is slightly tilted to avoid the interference of the bubbles with the image analysis.

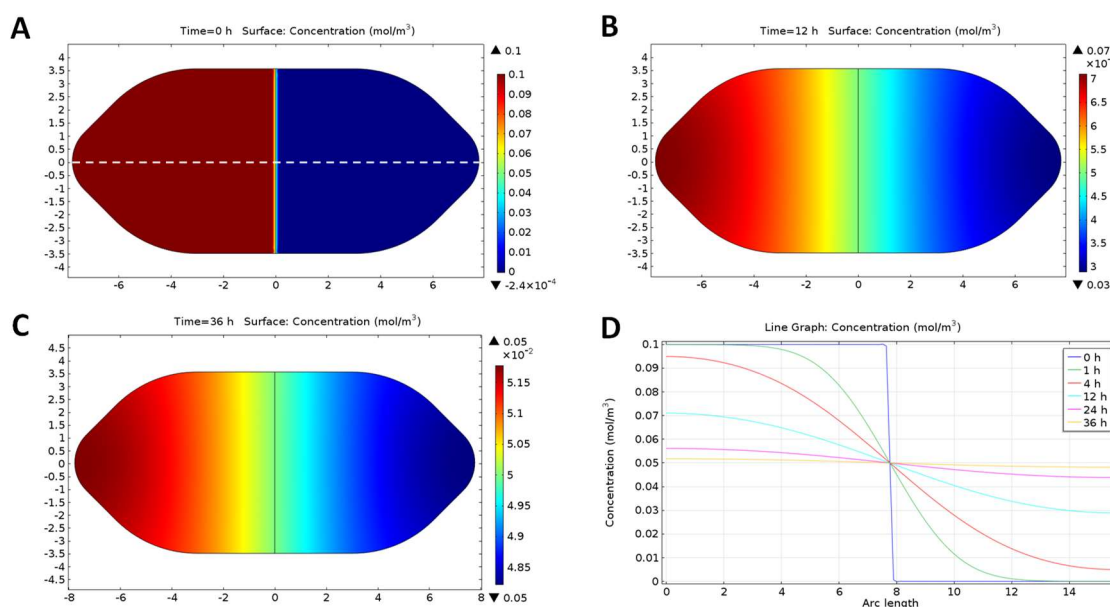

**Fig. S7.** 2D finite element simulation of a 200 µl chamber performed using the transport of diluted species module in COMSOL Multiphysics 5.0 as a time-dependent study. Mesh: physics-controlled mesh, extremely fine element size. Fluorescein diffusion coefficient:  $4.2 \times 10^{-10} \text{ m}^2/\text{s}$ . Fluorescein initial concentration:  $0.1 \text{ mol/m}^3$ . A) Initial conditions (time = 0h) where half of the chamber is filled with the diffusing molecule (red colour). B) Surface plot of the concentration distribution after 12 h. C) Surface plot of the concentration distribution after 36 h. D) Concentration profile across the dashed white cut line shown in Fig. S7A for different times. All size dimensions are in mm.

## Electronic Supplementary information (ESI)

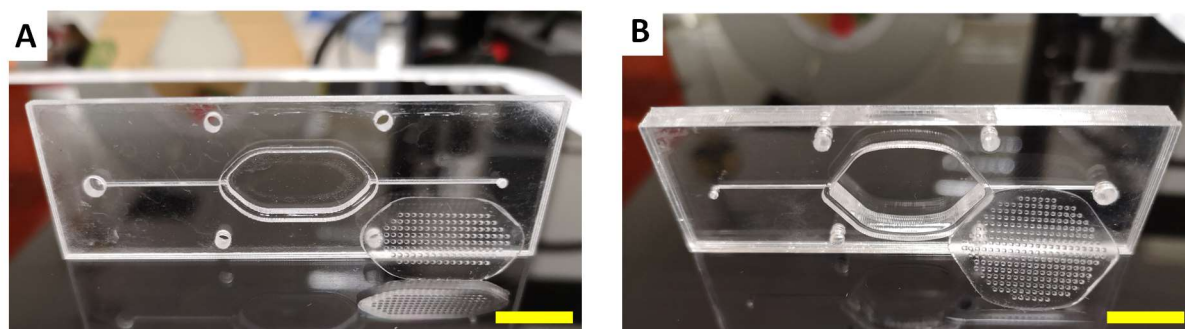

**Fig. S8.** Photographs of the PMMA chips and corresponding PDMS slabs used for the cfDNA extraction experiments. A) 255 µl chip and B) 1100 µl chip. Scale bars are 10 mm.

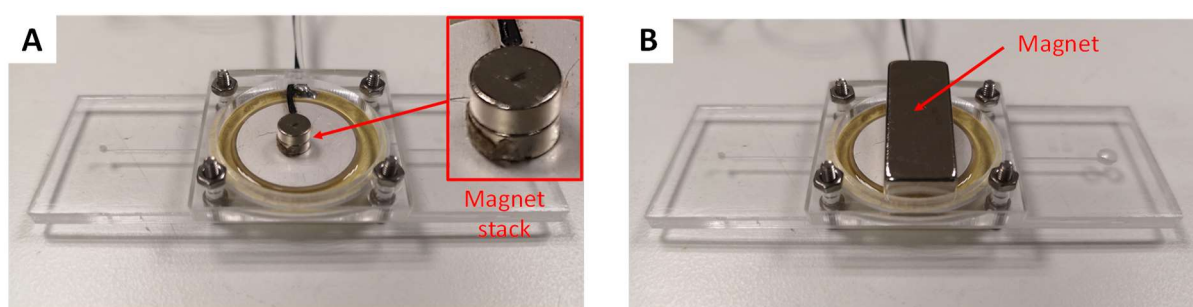

**Fig. S9.** Magnetic capture set-up for A) the beads disaggregation experiments and B) cfDNA capture experiments.

| Sample        | Chip extraction                                           | Bench                                                     |
|---------------|-----------------------------------------------------------|-----------------------------------------------------------|
|               | Plasma <b>100</b> µl / <b>500</b> µl                      | Plasma <b>100</b> µl / <b>500</b> µl                      |
| Lysis/Binding | <b>150</b> µl L/B solution + <b>5</b> µl beads            | <b>150</b> µl L/B solution + <b>5</b> µl beads            |
|               | <b>590</b> µl L/B solution + <b>10</b> µl beads           | <b>590</b> µl L/B solution + <b>10</b> µl beads           |
|               | Mix for 10 min                                            | Shake for 10 min                                          |
|               | Collect with magnet for 5 min                             | Centrifuge and collect on magnet for 5 min                |
|               | Remove supernatant                                        | Remove supernatant                                        |
| Wash 1        | Resuspend in <b>500</b> µl / <b>1100</b> µl Wash solution | Resuspend in <b>500</b> µl / <b>1100</b> µl Wash solution |
|               | Mix for 30 s                                              | Vortex for 30 s                                           |
|               | Collect with magnet for 2 min                             | Centrifuge and collect on magnet for 2 min                |
|               | Remove supernatant                                        | Remove supernatant                                        |
| Wash 2 & 3    | Resuspend in <b>500</b> µl / <b>1100</b> µl 80% ethanol   | Resuspend in <b>500</b> µl / <b>1100</b> µl 80% ethanol   |
|               | Mix for 30 s                                              | Vortex for 30 s                                           |
|               | Collect with magnet for 2 min                             | Centrifuge and collect on magnet for 1 min                |
|               | Remove supernatant                                        | Remove supernatant                                        |
|               | Repeat ethanol wash and collect beads in eppendorf        | Repeat ethanol wash                                       |
| Elution       | Airdry 10-15 min                                          | Airdry 10-15 min                                          |
|               | Add 20 µl of Elution Solution                             | Add 20 µl of Elution Solution                             |
|               | Shake for 5 min                                           | Shake for 5 min                                           |
|               | Collect beads on magnet for 2 min                         | Collect beads on magnet for 2 min                         |
|               | Collect elution with cfDNA                                | Collect elution with cfDNA                                |

**Table S1.** CfDNA extraction on-chip and manual workflow comparison



## Electronic Supplementary information (ESI)

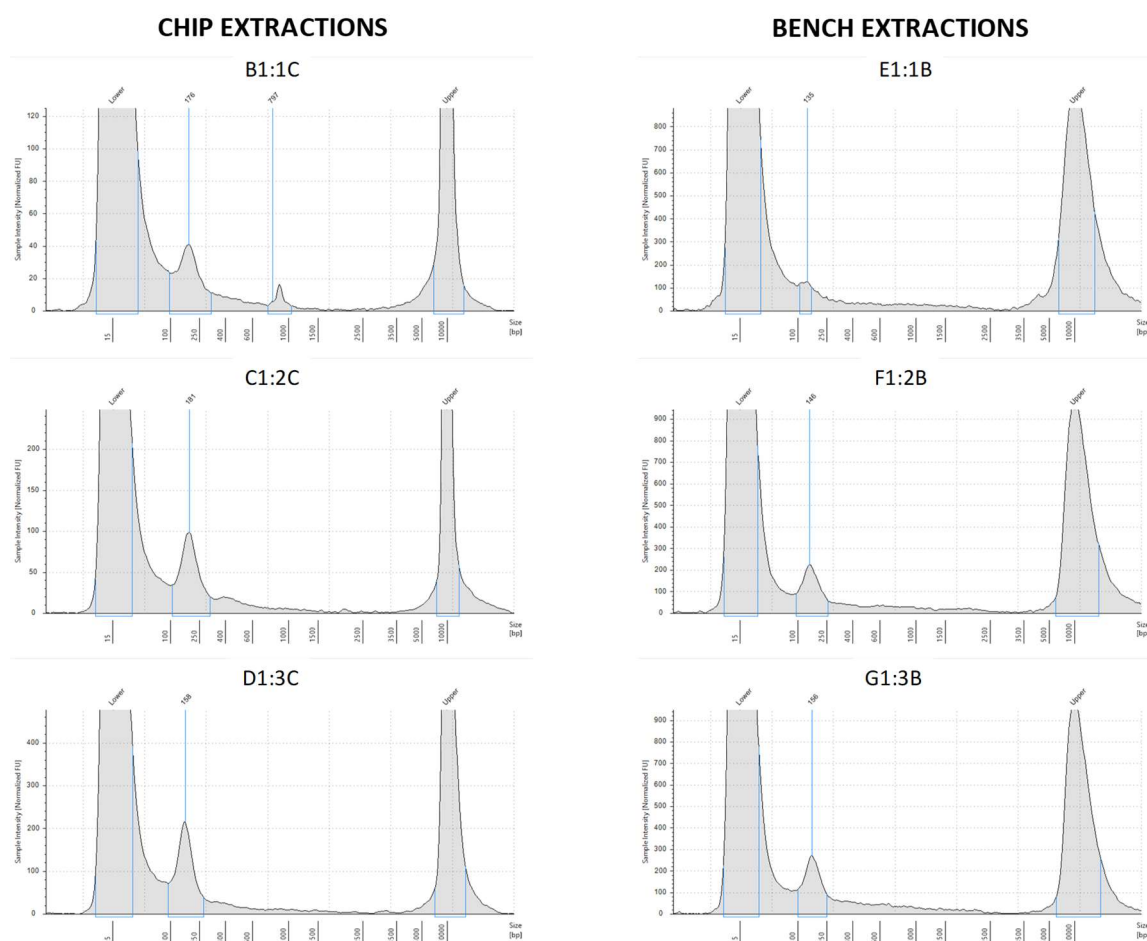

**Fig. S10.** Electropherograms of cfDNA from Agilent 4200 TapeStation HS D5000 ScreenTape System, extracted from 500  $\mu$ l of plasma. Only the 500  $\mu$ l plasma samples were run since the cfDNA concentration extracted from the controls of the 100  $\mu$ l of plasma sample was on the limit of detection of our preferred assay. Electropherograms B1-D1, cfDNA extracted on-chip; electropherograms E1-G1, cfDNA extracted manually on bench.

## SUPPORTING VIDEOS

- **Supporting video 1.** Video of a 100  $\mu$ l mixing chamber loaded with fluorescent microparticles showing the microstreaming effect produced by the oscillating bubbles when the piezoelectric is turned ON.
- **Supporting video 2.** Video of a 200  $\mu$ l mixing chamber (PMMA) showing the mixing effect and its corresponding image analysis from the cutline shown in the chamber under static flow conditions.
- **Supporting video 3.** Video of a mixing chamber under continuous flow conditions showing the mixing effect when the piezoelectric is turned ON and OFF. The total flow rate is 200  $\mu$ l/min.
- **Supporting video 4.** Video demonstrating the capability of the module to individually address two different micromixers integrated within the same monolithic chip.
- **Supporting video 5.** Video of a 200  $\mu$ l mixing chamber integrated into a chip fabricated with Fused Deposition Modelling (FDM) 3D printing technology showing the mixing effect under static flow conditions.
- **Supporting video 6.** Video of a 255  $\mu$ l mixing chamber showing the magnetic beads disaggregation and mixing effects after the piezoelectric is turned ON.
